# Supplementary material for: Neurochemical Correlates and Heterogeneous Clinical Response to Olanzapine in Schizophrenia: A Multidimensional Analysis of Central and Peripheral Biomarkers
Source: Research Square preprint supplement (doi:10.21203/rs.3.rs-7976871/v1), 2025-11-26
Supplement: Supplementary file 1 [file bc36466cd5c9476c918cffc4.docx]

**Title:** Neurochemical Correlates and Heterogeneous Clinical Response to Olanzapine in Schizophrenia: A Multidimensional Analysis of Central and Peripheral Biomarkers

**Brief title:** Biomarker-Based Stratification of Olanzapine Response in Schizophrenia

Authors: Wirginia Krzyściak1*, Maciej Pilecki2, Beata Bystrowska3, Marta Szwajca2, Natalia Śmierciak2, Aleksander Turek2, Paulina Karcz4, Amira Bryll5, Paulina Mazur1, Ewa Gomółka6, Tadeusz Popiela5

1 Department of Medical Diagnostic, Jagiellonian University Medical College, 30-688 Krakow, Poland

2 Department of Child and Adolescent Psychiatry, Jagiellonian University Medical College, 31-501 Krakow, Poland

3Department of Toxicology, Jagiellonian University Medical College, 30-688 Krakow, Poland

4Department of Electroradiology, Jagiellonian University Medical College, 31-126 Krakow, Poland

5Department of Radiology, Jagiellonian University Medical College, 31-501 Krakow Poland

6Toxicological Information Center, Department of Clinical Toxicology and Environmental Diseases, Jagiellonian University Medical College, 31-503 Krakow, Poland

**Corresponding author**:

Wirginia Krzyściak

Department of Medical Diagnostics

Jagiellonian University Medical College

30-688 Kraków, Poland

E-mail: [wirginiakrzysciak@cm-uj.krakow.pl](mailto:wirginiakrzysciak@cm-uj.krakow.pl)

| **Parameter** | **η²** | **p** |
| --- | --- | --- |
| PANSS negative symptoms score | 0.57 | **< 0.001** |
| PANSS total score | 0.57 | **< 0.001** |
| PANSS negative subscale items N1-N7 sum | 0.53 | **< 0.001** |
| (Glutamate + Glutamine) / (Cr + PCr) ratio (MRS, PCC, TE=30 ms) | 0.50 | **< 0.001** |
| (Glutamate + Glutamine) / (Cr + PCr) ratio (MRS, ACC, TE=30 ms) | 0.41 | **< 0.001** |
| Glutamate / (Cr + PCr) ratio (MRS, ACC, TE=30 ms) | 0.34 | **< 0.001** |
| Glutamine / (Cr + PCr) ratio (MRS, PCC, TE=30 ms) | 0.30 | **< 0.001** |
| Age (years) | 0.29 | **< 0.001** |
| CDSS total score | 0.23 | **0.002** |
| Glutamate / (Cr + PCr) ratio (MRS, PCC, TE=30 ms) | 0.19 | **0.007** |
| Male (proportion) | 0.16 | **0.016** |
| Glutamine / (Cr + PCr) ratio (MRS, ACC, TE=30 ms) | 0.15 | **0.018** |
| Proportion of patients with serum olanzapine concentration > 4.35 μg/L | 0.14 | **0.024** |
| BDI-II total score | 0.12 | **0.047** |

*Note:* η² indicates the proportion of variance in the variable explained by cluster membership. P-values are from ANOVA F-tests; values < 0.05 are considered significant. Only variables with p < 0.05 are presented.

Supplementary Table S1. Krzyściak Wirginia, Title: Biomarker-Based Stratification of Olanzapine Response in Schizophrenia. Associations between clusters and studied parameters.

| **Parameter** | **v-test** | **Mean in Cluster** | **Overall Mean** | **SD in Cluster** | **Overall SD** | **p** |
| --- | --- | --- | --- | --- | --- | --- |
| Age (years) | 2.19 | 33.18 | 27.71 | 5.98 | 9.27 | **0.014** |
| Male (proportion) | -2.22 | 0.27 | 0.57 | 0.45 | 0.50 | **0.013** |
| BDI-II total score | -2.39 | 10.09 | 18.74 | 8.32 | 13.41 | **0.008** |
| Proportion of patients with serum olanzapine concentration > 4.35 μg/L | -2.43 | 0.18 | 0.51 | 0.39 | 0.50 | **0.007** |
| CDSS total score | -3.01 | 3.55 | 8.54 | 3.03 | 6.14 | **0.001** |
| PANSS Negative Subscale Items N1-N7 Sum | -4.91 | 12.82 | 21.43 | 3.64 | 6.50 | **< 0.001** |
| PANSS total score | -5.19 | 50.91 | 79.88 | 12.54 | 20.69 | **< 0.001** |
| PANSS negative symptoms score | -5.26 | 11.91 | 21.22 | 4.19 | 6.56 | **< 0.001** |

*Note:* Only variables with p < 0.05 are shown. Positive v-tests indicate cluster means above the overall mean; negative values indicate below.

Supplementary Table S2. Krzyściak Wirginia, Title: Biomarker-Based Stratification of Olanzapine Response in Schizophrenia. Parameter profiles for cluster 1 (n = 11).

| **Parameter** | **v-test** | **Mean in Cluster** | **Overall Mean** | **SD in Cluster** | **Overall SD** | **p** |
| --- | --- | --- | --- | --- | --- | --- |
| PANSS Negative Subscale Items N1-N7 Sum | 3.64 | 25.27 | 21.43 | 3.78 | 6.50 | **< 0.001** |
| PANSS Total Score | 3.45 | 91.45 | 79.88 | 14.78 | 20.69 | **< 0.001** |
| PANSS Negative Symptoms Score | 3.30 | 24.73 | 21.22 | 3.21 | 6.56 | **< 0.001** |
| CDSS Total Score | 2.76 | 11.30 | 8.54 | 6.50 | 6.14 | **0.003** |
| Male (proportion) | 2.54 | 0.77 | 0.57 | 0.42 | 0.50 | **0.006** |
| Proportion of patients with serum olanzapine concentration > 4.35 μg/L | 2.12 | 0.68 | 0.51 | 0.47 | 0.50 | **0.017** |
| Glutamine / (Cr + PCr) Ratio (MRS, ACC, TE=30 ms) | -2.07 | 0.55 | 0.59 | 0.11 | 0.14 | **0.019** |
| Glutamate / (Glutamate / (Cr + PCr) Ratio (MRS, PCC, TE=30 ms) | -2.71 | 1.49 | 1.56 | 0.16 | 0.15 | **0.003** |
| Glutamine / (Cr + PCr) Ratio (MRS, PCC, TE=30 ms) | -2.99 | 0.57 | 0.64 | 0.12 | 0.14 | **0.001** |
| Glutamate / (Cr + PCr) Ratio (MRS, ACC, TE=30 ms) | -3.02 | 1.53 | 1.62 | 0.13 | 0.20 | **0.001** |
| (Glutamate + Glutamine) / (Cr + PCr) Ratio (MRS, ACC, TE=30 ms) | -3.33 | 2.07 | 2.21 | 0.17 | 0.26 | **< 0.001** |
| (Glutamate + Glutamine) / (Cr + PCr) Ratio (MRS, PCC, TE=30 ms) | -4.13 | 2.07 | 2.20 | 0.14 | 0.19 | **< 0.001** |

*Note:* Only variables with p < 0.05 are shown. Positive v-tests indicate cluster means above the overall mean; negative values indicate below.

Supplementary Table S3. Krzyściak Wirginia, Title: Biomarker-Based Stratification of Olanzapine Response in Schizophrenia. Parameter profiles for cluster 2 (n = 22).

| **Parameter** | **v-test** | **Mean in Cluster** | **Overall Mean** | **SD in Cluster** | **Overall SD** | **p** |
| --- | --- | --- | --- | --- | --- | --- |
| (Glutamate + Glutamine) / (Cr + PCr) Ratio (MRS, PCC, TE=30 ms) | 4.80 | 2.37 | 2.20 | 0.16 | 0.19 | **< 0.001** |
| (Glutamate + Glutamine) / (Cr + PCr) Ratio (MRS, ACC, TE=30 ms) | 4.49 | 2.44 | 2.21 | 0.24 | 0.26 | **< 0.001** |
| Glutamate / (Cr + PCr) Ratio (MRS, ACC, TE=30 ms) | 4.11 | 1.78 | 1.62 | 0.21 | 0.20 | **< 0.001** |
| Glutamine / (Cr + PCr) Ratio (MRS, PCC, TE=30 ms) | 3.78 | 0.74 | 0.64 | 0.13 | 0.14 | **< 0.001** |
| Glutamate / (Cr + PCr) Ratio (MRS, PCC, TE=30 ms) | 2.86 | 1.64 | 1.56 | 0.11 | 0.15 | **0.002** |
| Glutamine / (Cr + PCr) Ratio (MRS, ACC, TE=30 ms) | 2.75 | 0.66 | 0.59 | 0.13 | 0.14 | **0.003** |
| Age (years) | -3.69 | 21.17 | 27.71 | 7.55 | 9.27 | **< 0.001** |

*Note:* Only variables with p < 0.05 are shown. Positive v-tests indicate cluster means above the overall mean; negative values indicate below.

Supplementary Table S4. Krzyściak Wirginia, Title: Biomarker-Based Stratification of Olanzapine Response in Schizophrenia. Parameter profiles for cluster 3 (n = 18).
